# Supplementary material for: The n- and p-type thermoelectric response of a semiconducting Co-based quaternary Heusler alloy: a density functional approach
Source: Royal Society of Chemistry journal article supplement (doi:10.1039/c9tc00570f), 2019-01-01
Supplement: c9tc00570f1.pdf [file c9tc00570f1.pdf]

## Supporting Information

### The *n*- and *p*-type thermoelectric response of semiconducting Co-based quaternary Heusler alloy: A Density Functional approach

Enamullah and Pil-Ryung Cha

School of Advanced Materials Engineering,  
Kookmin University, Seoul, South Korea- 02707

Here, we provide the details of band structure and transport related coefficients obtained using the PBE and the HSE06 functional respectively.

#### 1 Electronic structure using PBE functional

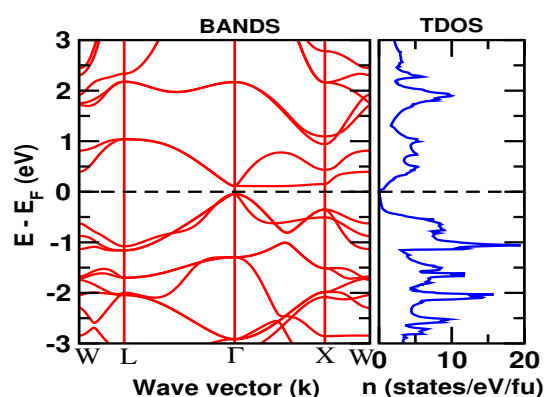

Figure 1: Electronic structure of CoFeTiAl using PBE exchange functional at relaxed lattice constant ( $a_{rlx} = 5.80 \text{ \AA}$ ). A small but finite band gap of 0.04 eV is obtained. Dashed line and TDOS represents the Fermi level ( $E_F$ ) and total density of states respectively.

#### 2 transport coefficients using hybrid functional (HSE06)

In this section, we present the optimal carrier concentration ( $n$ ) at 900K, which corresponds to the maximum power factor  $[(S^2\sigma/\tau)_{max}]$  and upper limit of  $ZT$  [i.e.  $(ZT_e)_{max}$ ] as depicted in table 1.

| HSE06     | $n$     | $S$   | $\sigma/\tau$ | $\kappa_e/\tau$ | $(S^2\sigma/\tau)_{max}$ | $(S^2\sigma/\tau)_{cal}$ | $(ZT_e)_{max}$ | $(ZT_e)_{cal}$ |
|-----------|---------|-------|---------------|-----------------|--------------------------|--------------------------|----------------|----------------|
| $n$ -type | -0.0043 | -6.68 | 0.0132        | 0.055           | —                        | $5.9 \times 10^{10}$     | 0.97           | —              |
| $p$ -type | 0.0022  | 6.04  | 0.0103        | 0.036           | —                        | $3.74 \times 10^{10}$    | 0.94           | —              |
| $n$ -type | -1.65   | -1.71 | 4.26          | 1.72            | $1.25 \times 10^{12}$    | —                        | —              | 0.0007         |
| $p$ -type | 9.14    | 0.913 | 11.9          | 3.17            | $9.96 \times 10^{11}$    | —                        | —              | 0.0003         |

Table 1: The given values of transport coefficients ( $n$ ,  $S$ ,  $\sigma/\tau$ , and  $\kappa_e/\tau$ ) are corresponding to the maximum power factor  $[(S^2\sigma/\tau)_{max}]$  and upper limit of  $ZT$  [i.e.  $(ZT_e)_{max}$ ]. The other parameters,  $[(S^2\sigma/\tau)_{cal}]$  and  $(ZT_e)_{cal}$  are calculated from the given value of transport coefficients. The value of  $n$ ,  $S$ ,  $\sigma/\tau$ ,  $\kappa_e/\tau$ , power factor are measured in  $10^{21}\text{cm}^{-3}$ ,  $10^{-4}\text{V/K}$ ,  $10^{19}(\Omega\text{ms})^{-1}$  and  $10^{15}\text{W/Kms}$  and  $\text{W/K}^2\text{ms}$ . ALL the transport coefficients are calculated under the HSE06 exchange functional at 900K.

From table1, it is clear that the carrier concentration obtained at maximum power factor  $[(S^2\sigma/\tau)_{max}]$  does not corresponds to the maximum  $ZT$  [i.e.  $(ZT_e)_{max}$ ] or, in other words, the values of  $n$  corresponding to  $(S^2\sigma/\tau)_{max}$  and  $(ZT_e)_{max}$  are different. For example, considering the  $n$ -type behavior, the optimal  $n$  corresponding to  $(ZT_e)_{max}$  is  $-4.32 \times 10^{18}\text{cm}^{-3}$  and the corresponding calculated power factor [i.e.  $(S^2\sigma/\tau)_{cal}$ ] is  $5.9 \times 10^{10}\text{ (W/K}^2\text{ms)}$ , which is different from the obtained value of maximum power factor ( $1.25 \times 10^{12}\text{ W/K}^2\text{ms}$ ).
